# Supplementary material
Source: MDPI journal article supplement (https://www.mdpi.com/2227-9717/8/9/1191)
Supplement: s1 [file s1]

## Supplementary Figures

### Inhibitory Effects of Thymol Isolated from *Curcuma longa* L. on Adipogenesis in HepG2 Cells

Dam-Hee Kang <sup>1,†</sup>, Young-Seob Lee <sup>2,†</sup>, Seon Min Oh <sup>2</sup>, Dahye Yoon <sup>2</sup>, Doo Jin Choi <sup>2</sup>, Dong-Yeul Kwon <sup>1</sup>, Ok-Hwa Kang <sup>1,\*</sup> and Dae Young Lee <sup>2,\*</sup>

<sup>1</sup> College of Pharmacy and Wonkwang-Oriental Medicines Research Institute, Institute of Biotechnology, Wonkwang University, Iksan 54538, Korea; fjrhuegru@hanmail.net (D.-H.K.); sssimi@wku.ac.kr (D.-Y.K.)

<sup>2</sup> Department of Herbal Crop Research, National Institute of Horticultural and Herbal Science, RDA, Eumseong 27709, Korea; youngseoble@korea.kr (Y.-S.L.); seonmin88@korea.kr (S.M.O.); dahyeyoon@korea.kr (D.Y.); cdj0105@korea.kr (D.J.C.)

\* Correspondence: okey@wonkwang.ac.kr (O.-H. K.); dylee0809@gmail.com (D.Y.L.)

† These authors contributed equally to this work.

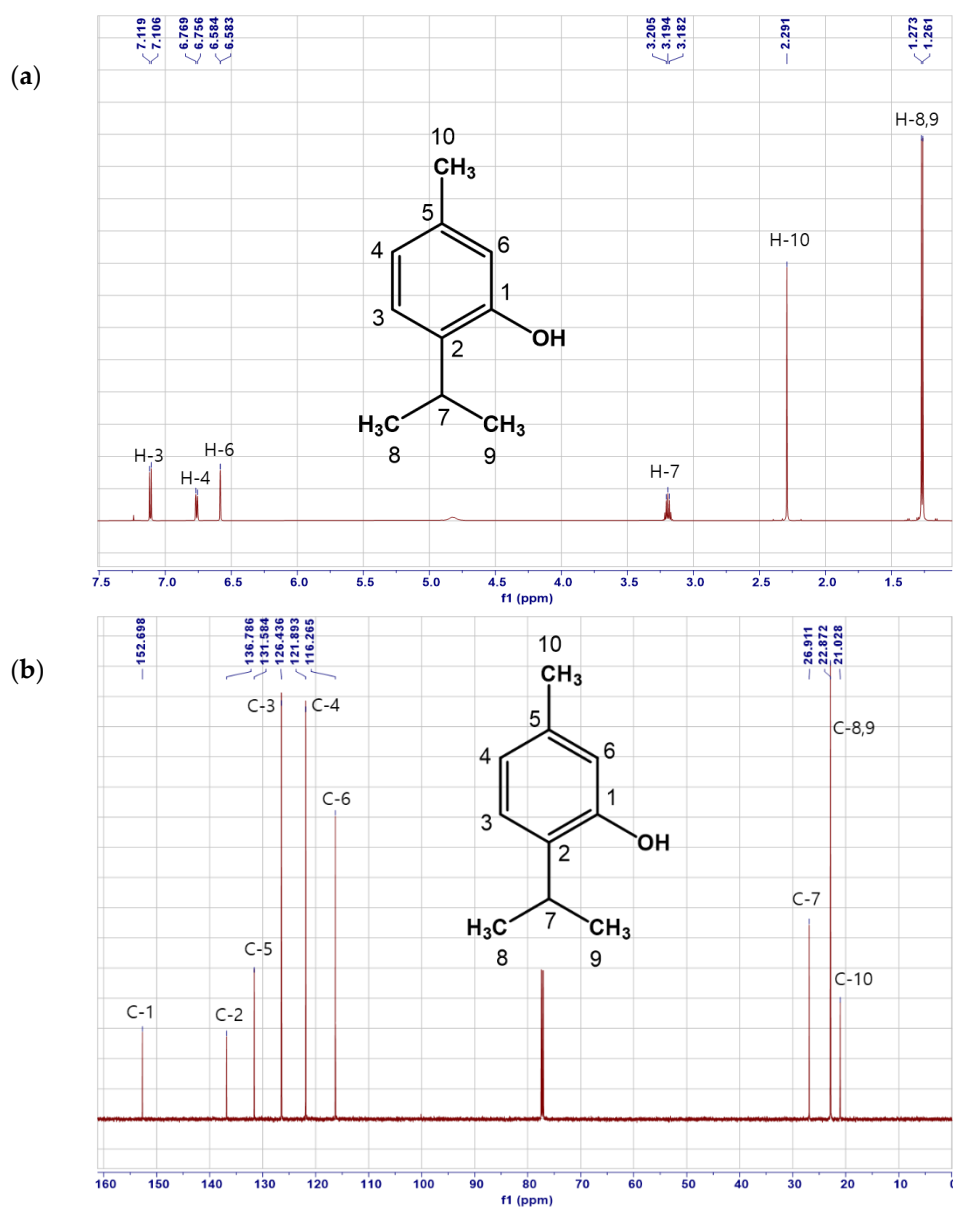

Figure S1. <sup>1</sup>H (a) and <sup>13</sup>C (b) NMR data of thymol isolated from *Curcuma longa*.

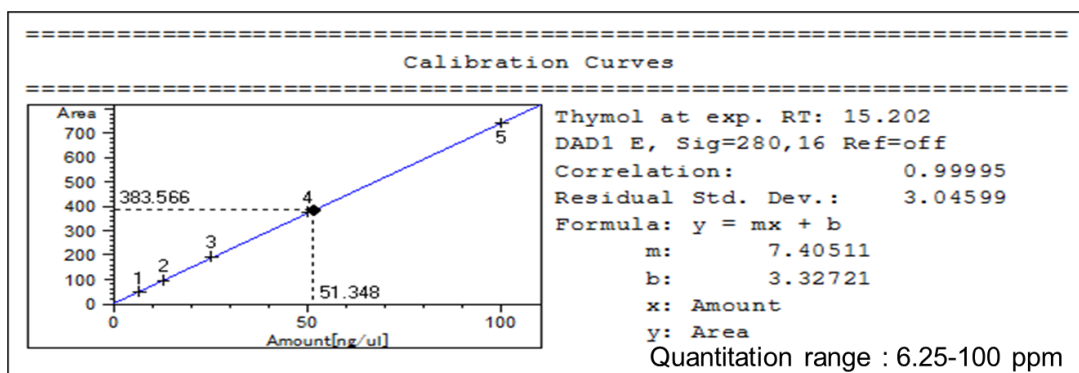

| Lots # | Amount (ppm) | Amount (mg/g) | Amount (mg/g) |        |
|--------|--------------|---------------|---------------|--------|
| Lots 1 | 51.3482      | 10.2696       | average       | 10.679 |
| Lots 2 | 55.7764      | 11.1553       | stdev         | 0.4467 |
| Lots 3 | 53.0555      | 10.6111       | RSD           | 4.1828 |

Figure S2. Quantification and calibration curve of thymol isolated from *Curcuma longa*.
